# Supplementary material
Source: PubMed Central journal article supplement (PMC6503987)
Supplement: develop-146-175117-s1.pdf [file develop-146-175117-s1.pdf]

## Supplementary Information

Table S1. PCR primers for genotyping.

| Target  | Forward primer<br>(5' to 3') | Reverse primer<br>(5' to 3') | Product length<br>(bp) |
|---------|------------------------------|------------------------------|------------------------|
| Phd2    | CAAATGGAGATGGAAGATGC         | TCAACTCGAGCTGGAAACC          | floxed, 840<br>wt, 389 |
| Phd2    | AACTCCGCCAAGCAGGTCAGAA       | CCCGAAGAACGATACCGTCGAG       | deleted, 140           |
| GFAPCre | ACTCCTTCATAAAGCCCTCG         | ATCACTCGTTGCATCGACCG         | GFAPCre, 230           |

Table S2. qPCR primers.

| Target         | Forward primer<br>(5' to 3') | Reverse primer<br>(5' to 3') |
|----------------|------------------------------|------------------------------|
| Phd2           | TAAACGGCCGAACGAAAGC          | GGGTTATCAACGTGACGGACA        |
| VEGF-A         | GCACATAGGAGAGATGAGCTTCC      | CTCCGCTCTGAACAAGGCT          |
| PDGF-A         | CCTGTGCCATTTCGAGGAAGAGA      | TTGGCCACCTTGACACTGCGGTG      |
| EPO            | TAGCCTCACTTCACTGCTTCG        | GCTTGCAGAAAGTATCCACTGT       |
| $\beta$ -actin | GGCTGTATTCCCCTCCATCG         | CCAGTTGGTAACAATGCCATGT       |

**Table S3. Antibodies and other staining reagents**

| Antibodies/staining reagents                      | Application            | Target Cells/Tissues | Supplier                               | Catalog #   | Final Conc. /dilution   |
|---------------------------------------------------|------------------------|----------------------|----------------------------------------|-------------|-------------------------|
| Rat anti-GFAP                                     | Whole mount IF         | astrocytes           | Life Technologies (Thermo Fisher)      | I-30300     | 1:500                   |
| Rabbit anti-Pax2                                  | Whole mount IF         | astrocytes           | Abcam                                  | Ab79389     | 1 µg/ml                 |
| Rabbit anti-Collagen IV                           | Whole mount IF         | basement membrane    | Millipore (Thermo Fisher)              | AB755P      | 2 µg/ml                 |
| Goat anti- PDGFR $\alpha$                         | Whole mount IF         | astrocytes           | R&D Systems (Thermo Fisher)            | AF1062      | 1:100                   |
| Rat anti-BrdU -Biotin                             | Whole mount IF         | proliferative cells  | Abcam                                  | Ab171059    | 1:1000                  |
| Anti- Caspase 3 (against active fragment)         | Whole mount IF         | Apoptotic cells      | Cell Signaling                         | 9661S       | 1:200                   |
| Mouse anti-actin $\alpha$ -Smooth Muscle -FITC    | Whole mount IF         | VSMCs                | Sigma-Aldrich                          | F3777       | 1:100                   |
| Anti-VEGF                                         | Intravitreal injection | Ocular VEGF-A        | Cedarlane                              | CL9188AP    | 1.8 µg/µl; 1 µl per eye |
| Rat anti-PHD2                                     | Blotting               | N/A                  | Maine Biotechnologies                  | Custom-made | 1:100                   |
| Anti-HIF-1 $\alpha$                               | Blotting               | N/A                  | Novus Biologicals                      | NB100-449   | 1:200                   |
| Anti-HIF-2 $\alpha$                               | Blotting               | N/A                  | Novus Biologicals                      | NB100-132   | 1:100                   |
| Anti- $\beta$ -actin                              | Blotting               | N/A                  | Santa Cruz Biotechnology               | sc-1616     | 1:200                   |
| Goat anti-rabbit Alexa Fluor <sup>®</sup> -488    | Whole mount IF         | N/A                  | Life Technologies (Thermo Fisher)      | A-11034     | 1:200                   |
| Goat anti-rat IgG-Alexa Fluor <sup>®</sup> -488   | Whole mount IF         | N/A                  | Life Technologies (Thermo Fisher)      | A-11006     | 1:200                   |
| Donkey anti-rabbit IgG-Cy3                        | Whole mount IF         | N/A                  | Jackson ImmunoResearch; West Grove, PA | 11473299    | 2 µg/ml                 |
| Donkey anti-goat Alexa Fluor <sup>®</sup> -488    | Whole mount IF         | N/A                  | Life Technologies (Thermo Fisher)      | A-11055     | 1:200                   |
| Goat anti-mouse IgG-Alexa Fluor <sup>®</sup> -488 | Whole mount IF         | N/A                  | Life Technologies (Thermo Fisher)      | A-11001     | 1:200                   |
| IB <sub>4</sub> -Alexa Fluor <sup>®</sup> -594    | Whole mount            | Endothelial cells    | Life Technologies (Thermo Fisher)      | I-21413     | 1:100                   |
| IB <sub>4</sub> -Alexa Fluor <sup>®</sup> 647     | Whole mount            | Endothelial cells    | Life Technologies (Thermo Fisher)      | I-32450     | 1:100                   |
| Streptavidin-DyLight <sup>®</sup> -549            | Whole mount IF         | Proliferative cells  | Jackson ImmunoResearch; West Grove, PA | 016-500-084 | 1:500                   |

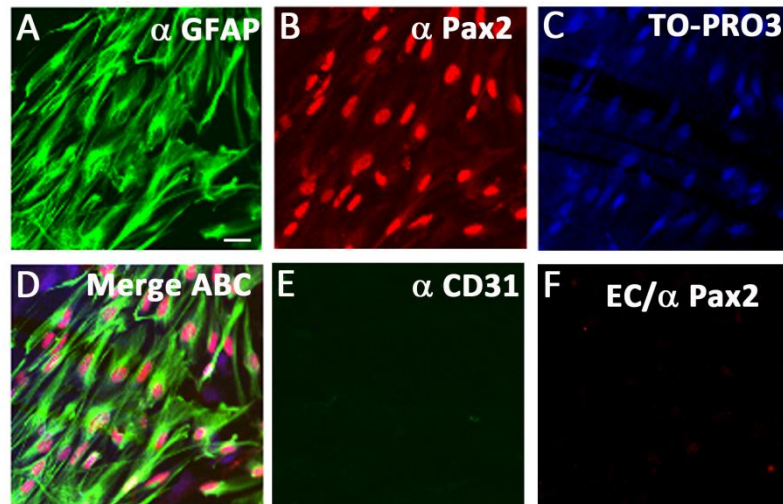

**Figure S1. Primary retinal astrocyte cultures.** A-E. Examples from wild-type mice, stained with anti-GFAP and anti-Pax2 to show astrocytic identity. Anti-CD31 staining indicated lack of contaminating ECs. F. Endothelial cell culture, showing that ECs do not express Pax2, thus further confirming lack of contaminating ECs in astrocyte cultures as shown in A-E. Scale bar, 50  $\mu$ m.

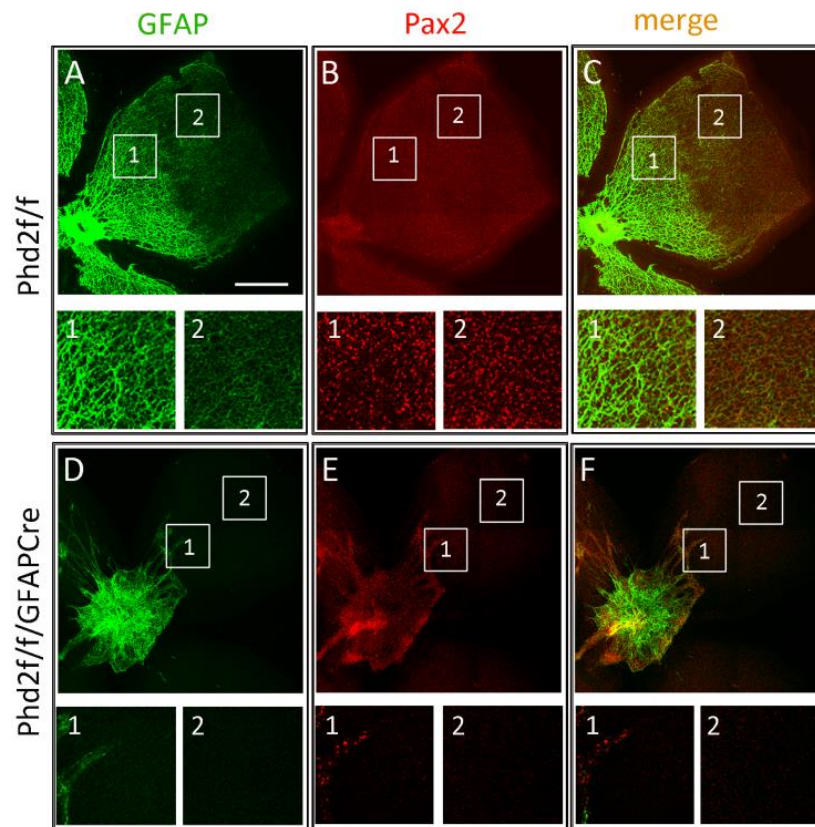

**Figure S2. Retinal astrocyte migration and differentiation was severely blocked in Phenotype B mice (representing 9% of all *Phd2<sup>f/f</sup>/GFAP<sup>Cre</sup>* mice).** Retinas were dissected at P5, and stained with anti-GFAP and anti-Pax2. Panels 1 and 2 match white boxes in main images. Note that D-F, GFAP<sup>+</sup> and Pax2<sup>+</sup> cells are virtually absent beyond box 1. Images shown are representative of 4 mice per group. Scale bar, 500  $\mu$ m.

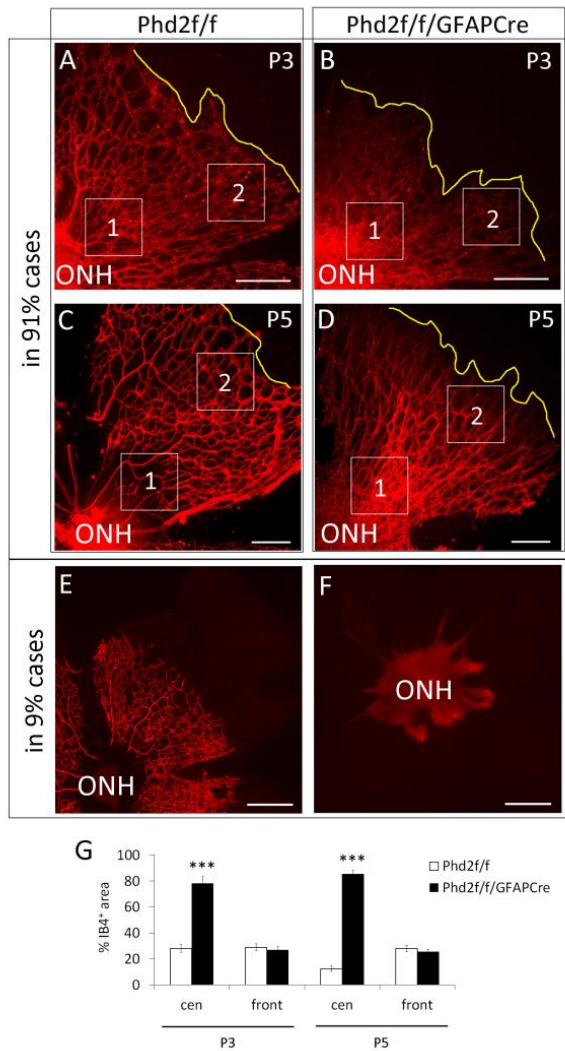

**Figure S3. Presence of two distinct retinal vascular phenotypes in *Phd2<sup>fl/fl</sup>/GFAP<sup>Cre</sup>* mice.** A-D, Phenotype A (representing 91% cases). Wavy yellow lines mark vascular front. Note dense IB4<sup>+</sup> signals near ONH in *Phd2<sup>fl/fl</sup>/GFAP<sup>Cre</sup>* mice. E and F. Phenotype B (found in 9% of *Phd2<sup>fl/fl</sup>/GFAP<sup>Cre</sup>* mice). In this subtype, IB4<sup>+</sup> cells failed to migrate towards the retinal periphery, but were instead clumped near the ONH. G. Quantification of retinal vascular development in Phenotype A mice. Box 1 is near the central area of the retina (“cen”) and Box 2 just behind the vascular front. Scale bars: 200 μm for A-D; E and F, 500 μm. n = 6 mice/group. \*\*\*, p < 0.001.

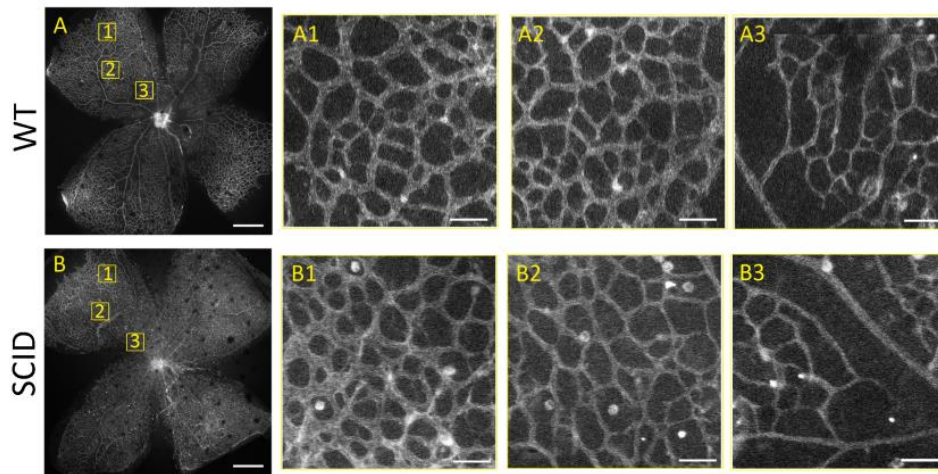

**Figure S4. Developmental vascular pruning in mouse retinas is independent of T cells.** Retinas were dissected from wild-type (WT) and SCID mice at P8, and subject to IB<sub>4</sub> staining. Stained retinas were imaged by confocal microscopy as flat-mounts. Yellow boxes 1, 2, and 3 are expanded and shown to the right of the main panels. Images are representative of 4 mice per group. Scale bars: A and B, 500  $\mu$ m. A1-A3 and B1-B3, 50  $\mu$ m.
